# Supplementary material for: Cancer-Associated Fibroblast-Derived Interleukin-8 Promotes Ovarian Cancer Cell Stemness and Malignancy Through the Notch3-Mediated Signaling
Source: PubMed Central journal article supplement (PMC8280773; doi:10.3389/fcell.2021.684505), 2021-07-01
Supplement: Table_1.pdf [file Table_1.pdf]

## Supplementary table

Sequences of primers are provided in **table1**

---

| Gene     | 5-3 primer sequence                                                                                                                                      |         |
|----------|----------------------------------------------------------------------------------------------------------------------------------------------------------|---------|
| IL-8     | Forward: CTCTTGGCAGCCTTCCTGATTTC<br>Reverse: TTTTCCTTGGGGTCCAGACAGAG                                                                                     |         |
| CXCR1    | Forward: CTGACCCAGAAGCGTCACTTG<br>Reverse: CCAGGACCTCATAGCAAAGT                                                                                          | qRT-PCR |
| CXCR2    | Forward: CCTGTCTTACTTTTCCGAAGGAC<br>Reverse: TTGCTGTATTGTTGCCCATGT                                                                                       |         |
| IL-8-sh1 | Forward:<br>CCGGCAAGGAGTGCTAAAGAACTTACTCGAGTAAGTTCTTTA<br>GCACTCCTTGTTTTTG<br><br>Reverse: :                                                             | sh      |
| IL-8-sh2 | Forward:<br>CCGGGCTCTGTGTGAAGGTGCAGTTCTCGAGAACTGCACCTT<br>CACACAGAGCTTTTTG<br>Reverse:<br>AATTCAAAAAGCTCTGTGTGAAGGTGCAGTTCTCGAGAACTG<br>CACCTTCACACAGAGC |         |
| IL-8-sh3 | Forward:<br>CCGGACTTAGATGTCAGTGCATAAACTCGAGTTTATGCACTG<br>ACATCTAAGTTTTTTG<br>Reverse:<br>AATTCAAAAACCTTAGATGTCAGTGCATAAACTCGAGTTTATG<br>CACTGACATCTAAGT |         |

---
